# Supplementary material for: A new approach for the ultra-high loading of curcumin onto a nano-sized ZIF-68 as an effective drug delivery system with good biocompatibility and efficient anti-cancer therapy
Source: Royal Society of Chemistry journal article supplement (doi:10.1039/d6ra02515c), 2026-04-22
Supplement: d6ra02515c1.pdf [file d6ra02515c1.pdf]

## Supporting information

### **A new approach for the ultra-high loading of curcumin onto a nano-sized ZIF-68 as an effective drug delivery system with good biocompatibility and efficient anti-cancer therapy**

Duy Ba Nguyen,<sup>a</sup> Phuong Bich Tran,<sup>a</sup> Quynh Ngoc Thi Luong,<sup>a</sup> Viet Ngoc Huynh,<sup>a</sup> Anh Ngoc Thi Phan,<sup>a</sup> Vu Tuyet Luu,<sup>a</sup> Duong Hoang Dang,<sup>a</sup> Hung Ngoc Nguyen,<sup>a</sup> Loc Cam Luu,<sup>b,d</sup> Tan Le Hoang Doan<sup>c,d</sup> and My Van Nguyen<sup>\*a</sup>

<sup>a</sup>Faculty of Chemistry, Ho Chi Minh City University of Education, Ho Chi Minh City, 700000, Vietnam.

<sup>b</sup>HCMC University of Technology, VNU-HCM, 268 Ly Thuong Kiet, District 10, Ho Chi Minh City, Vietnam.

<sup>c</sup>Center for Innovative Materials and Architectures (INOMAR), Ho Chi Minh City, Vietnam.

<sup>d</sup>Vietnam National University, Ho Chi Minh City, Vietnam.

\*To whom correspondence should be addressed: [mynv@hcmue.edu.vn](mailto:mynv@hcmue.edu.vn)

**Section S1.** The Standard Curve of Curcumin

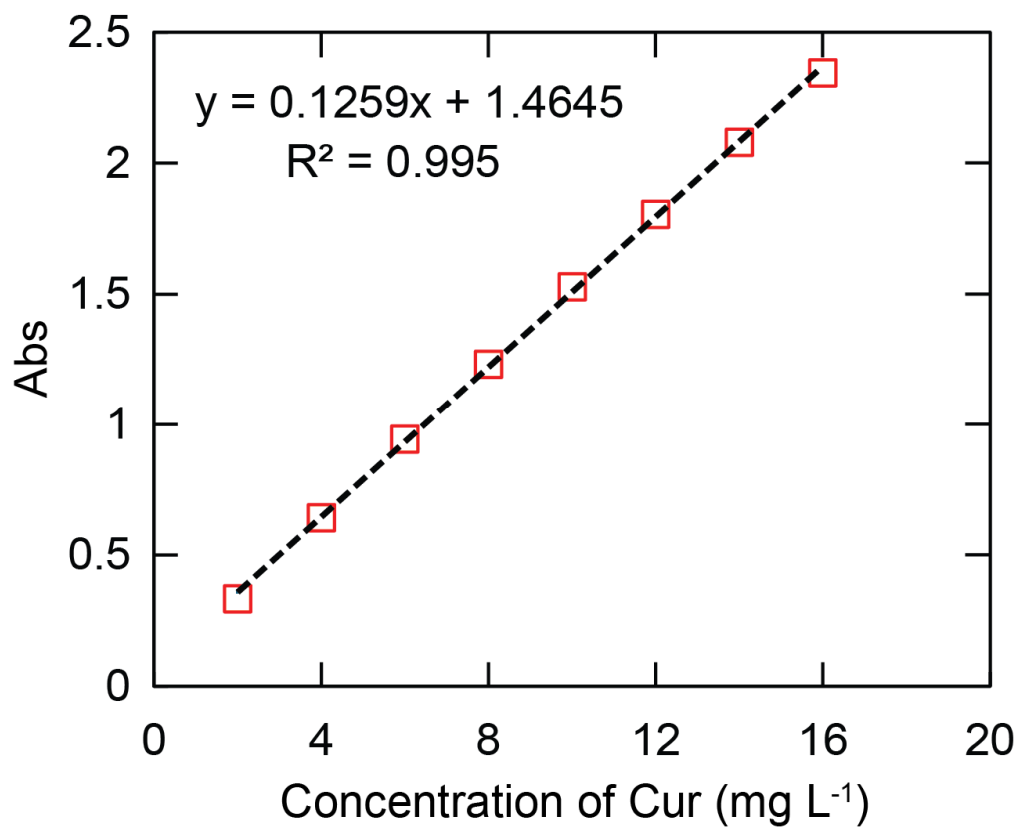

**Figure S1.** The relationship between the absorbed intensity and the Cur various concentrations of 2 – 20 mg L<sup>-1</sup> by linear fitting.

## Section S2. Elemental Mapping Spectroscopy

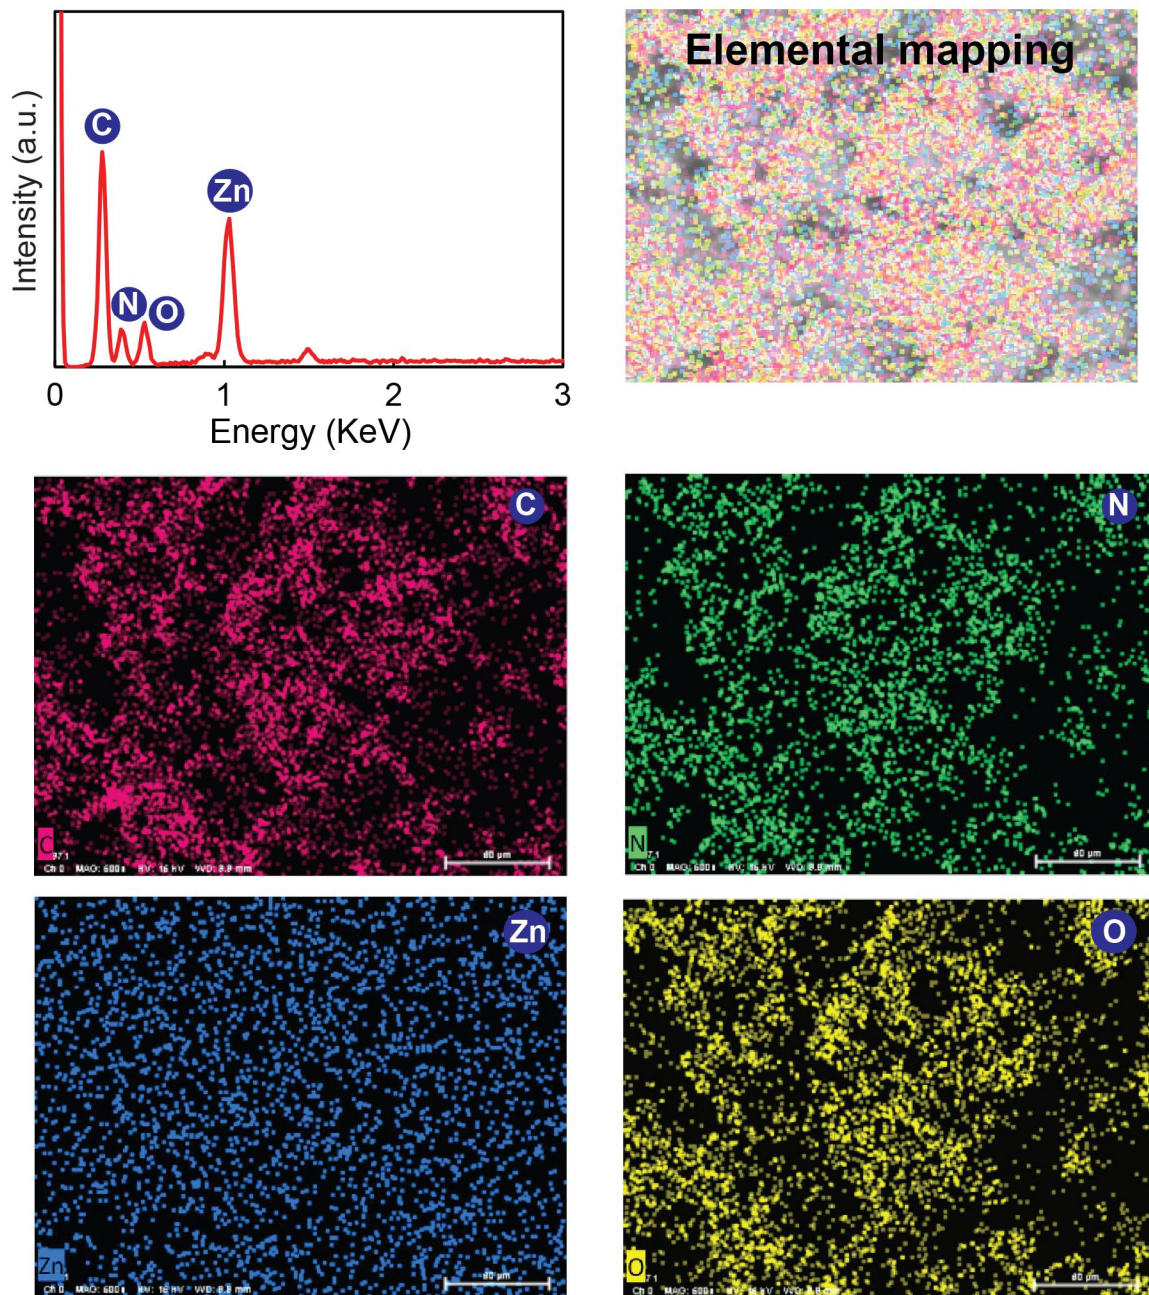

**Figure S2.** Elemental mapping by SEM-EDX of activated ZIF-68.

### Section S3. The Stability of ZIF-68 after Cur Loading

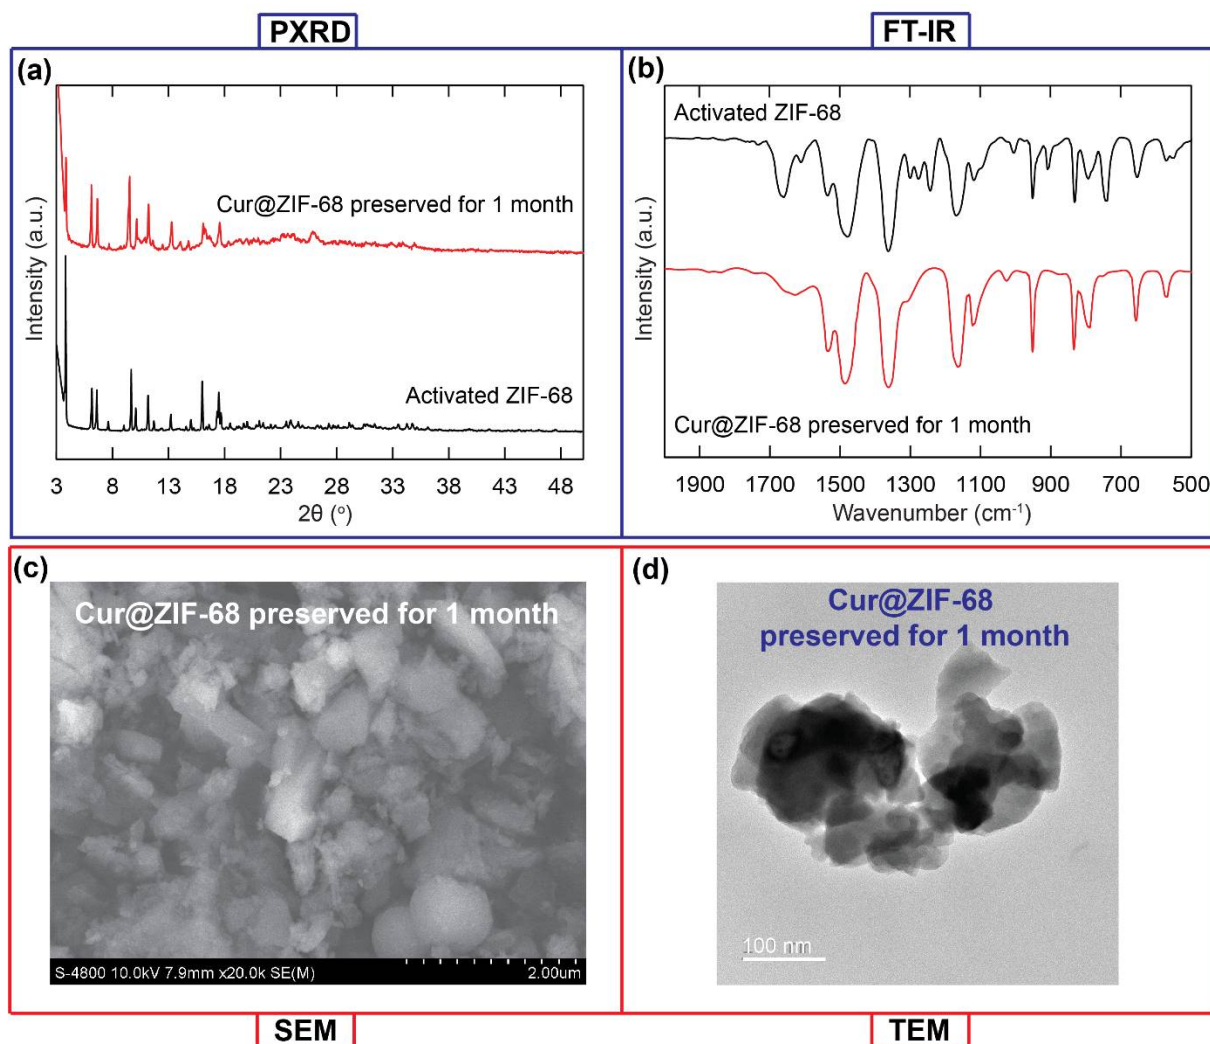

**Figure S3.** The PXRD pattern of activated ZIF-68 (black) in comparison with the PXRD pattern of Cur@ZIF-68 preserved for 1 month (red) (a); The FT-IR spectra of activated ZIF-68 (black) in comparison with the PXRD pattern of Cur@ZIF-68 preserved for 1 month (red) (b); SEM image at a scale bar of 2  $\mu\text{m}$  (c) and TEM image at a scale bar of 100 nm (d) of Cur@ZIF-68 preserved for 1 month.

## Section S4. X-ray Photoelectron Spectroscopy

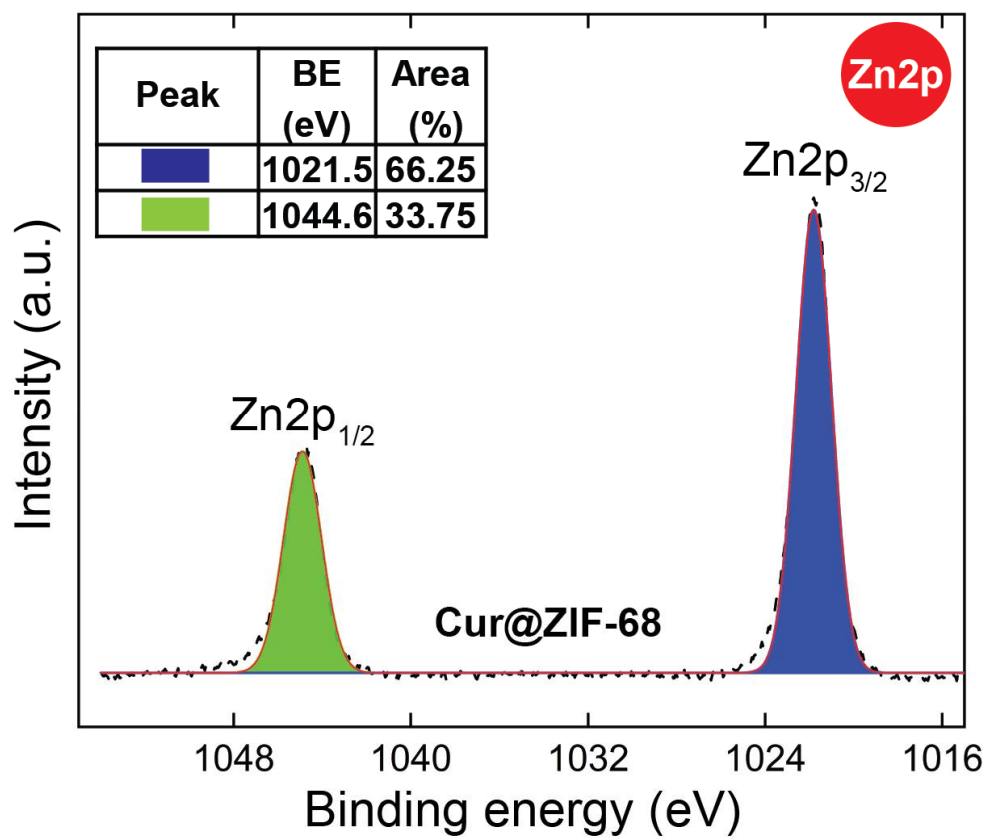

**Figure S4.** The high-resolution spectrum of Zn 2p in Cur@ZIF-68.

## Section S5. In Vitro Drug Release Experiments

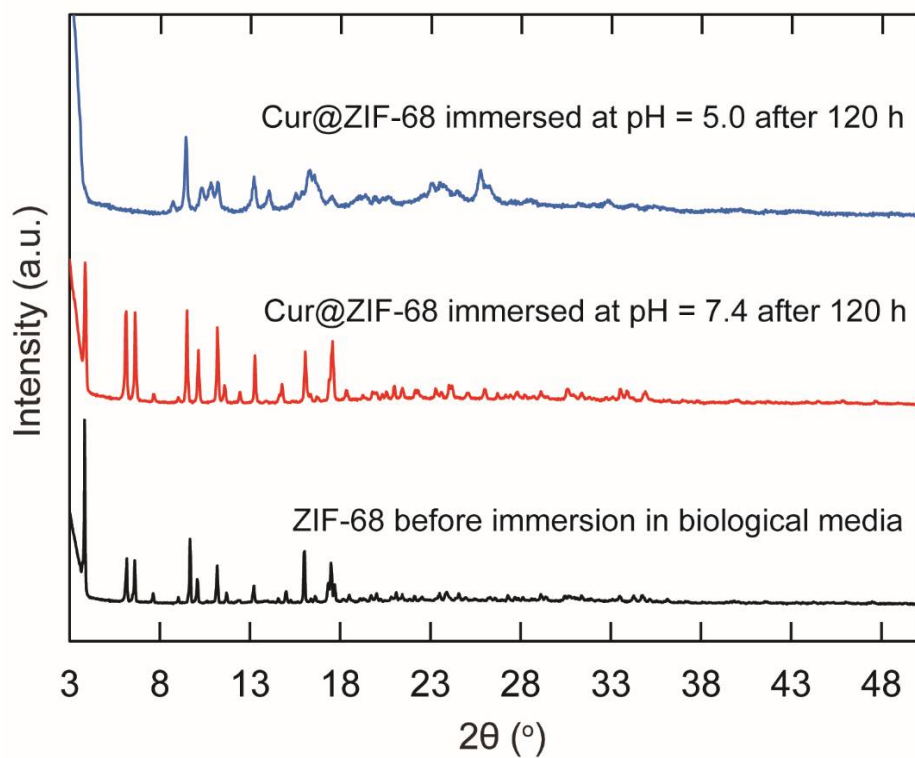

**Figure S5.** The PXRD pattern of ZIF-68 (black) in comparison with the PXRD patterns of Cur@ZIF-68 immersed at pH = 7.4 (red) and 5.0 (blue) after 120 h

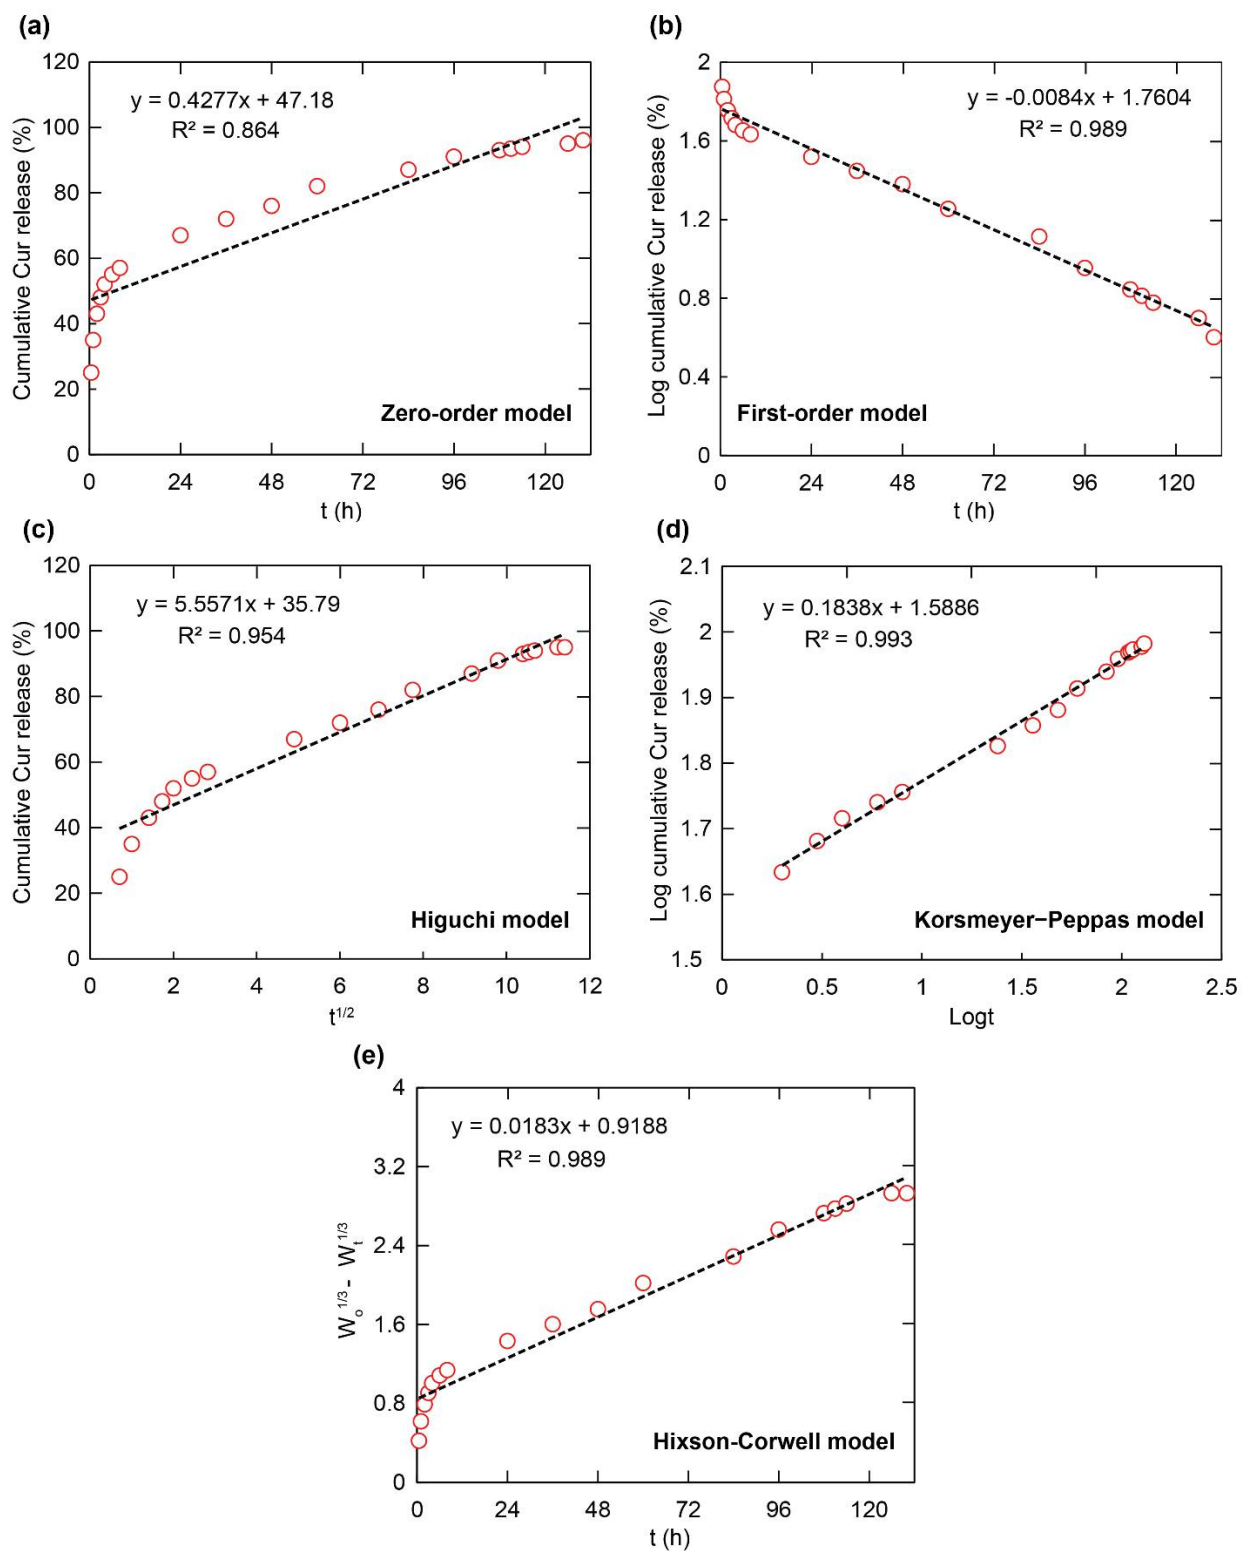

**Figure S6.** The release profile of Cur@ZIF-68 at pH 5.0

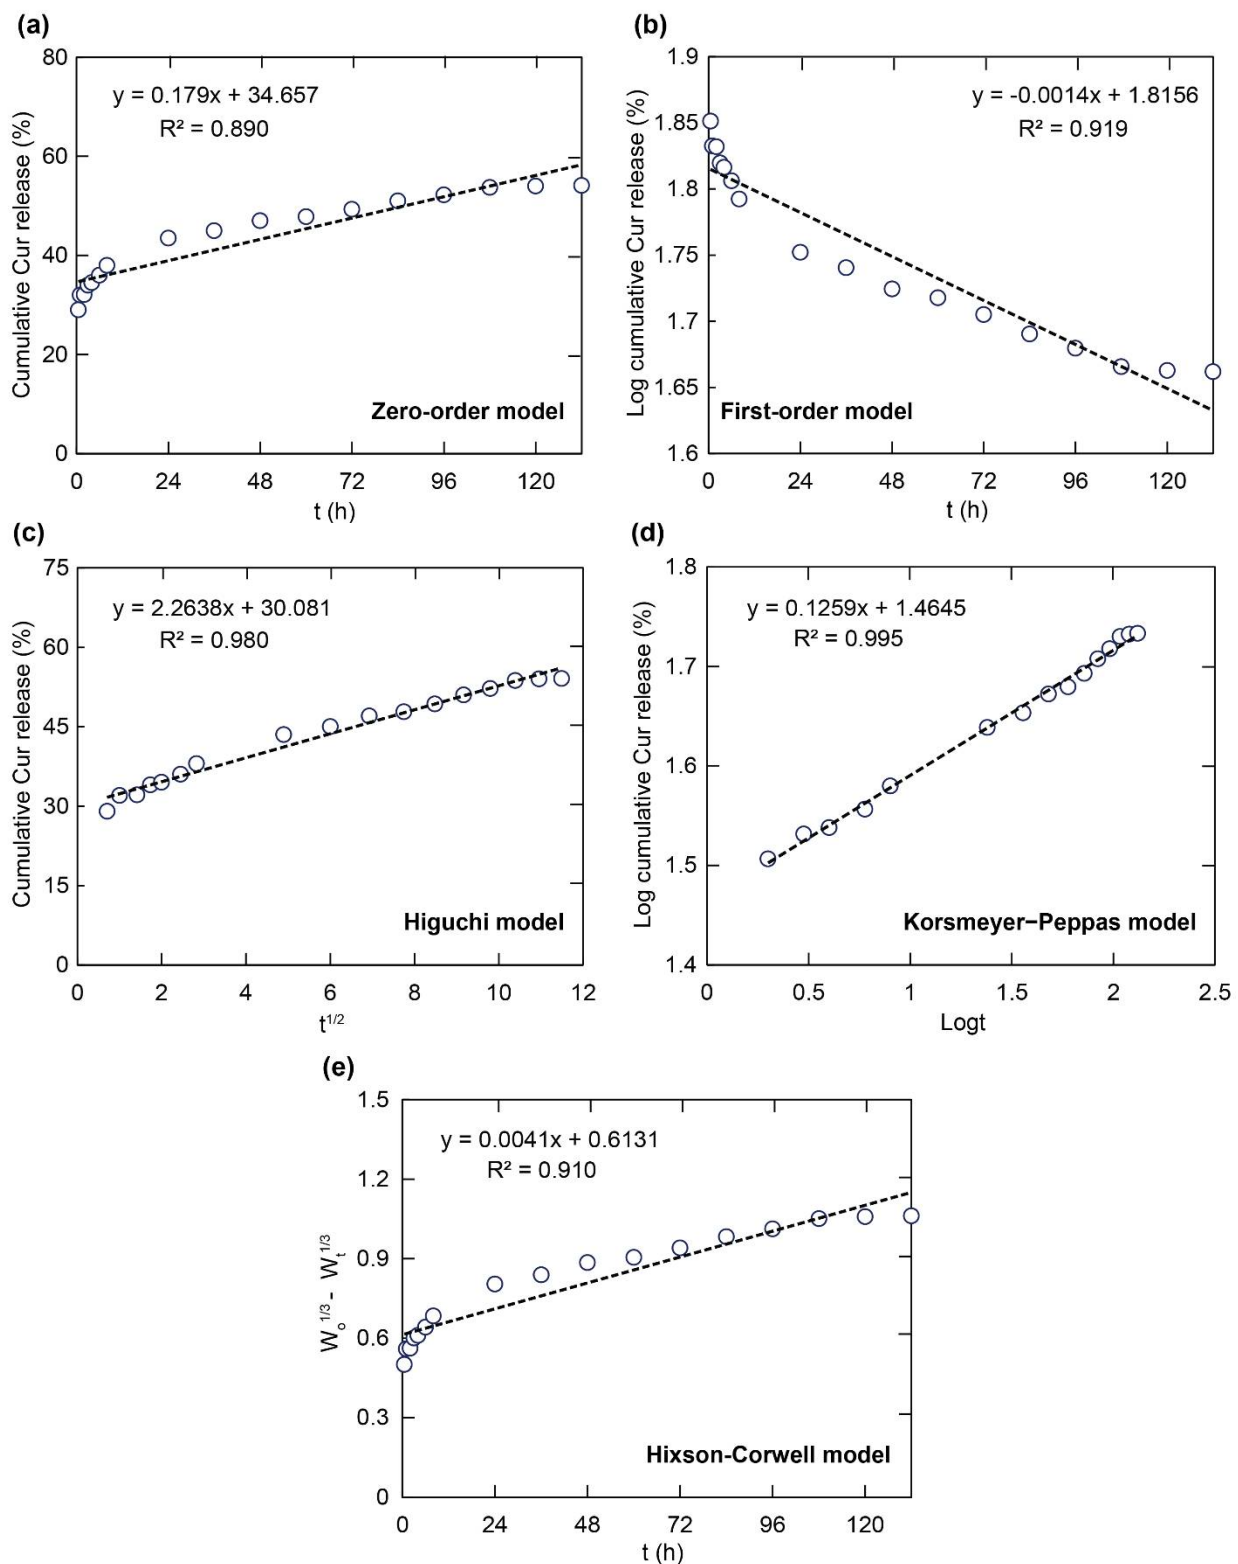

**Figure S7.** The release profile of Cur@ZIF-68 at pH 7.4

Section S6. Bright-Filed Microscopy Images

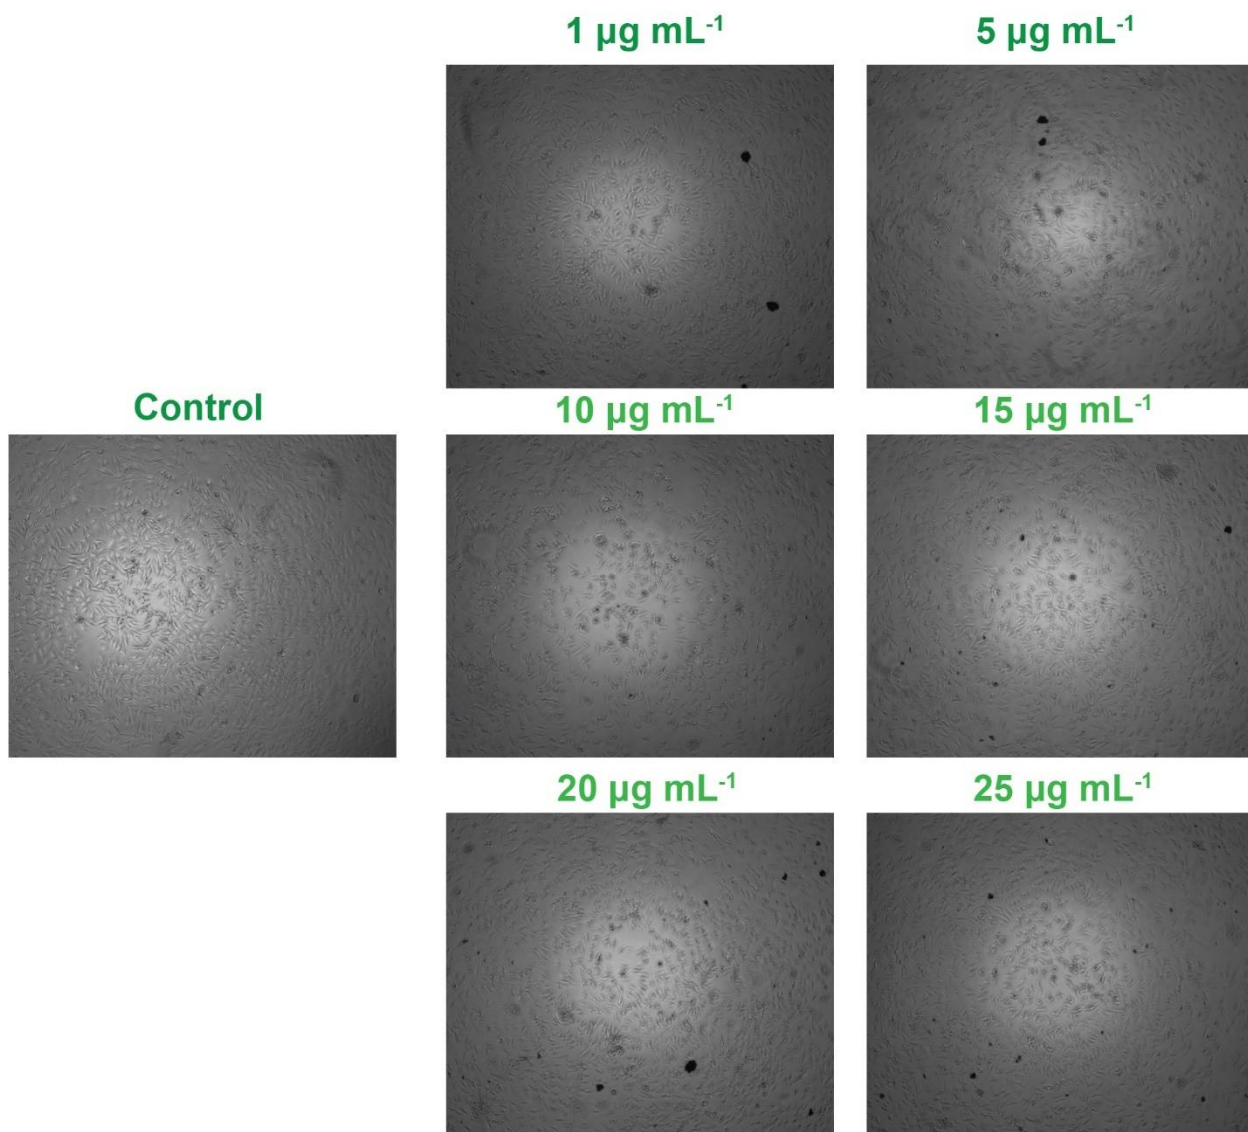

**Figure S8.** The bright-field microscopy images of ZIF-68 were collected from the cytotoxicity experiment towards the HDF normal cells.

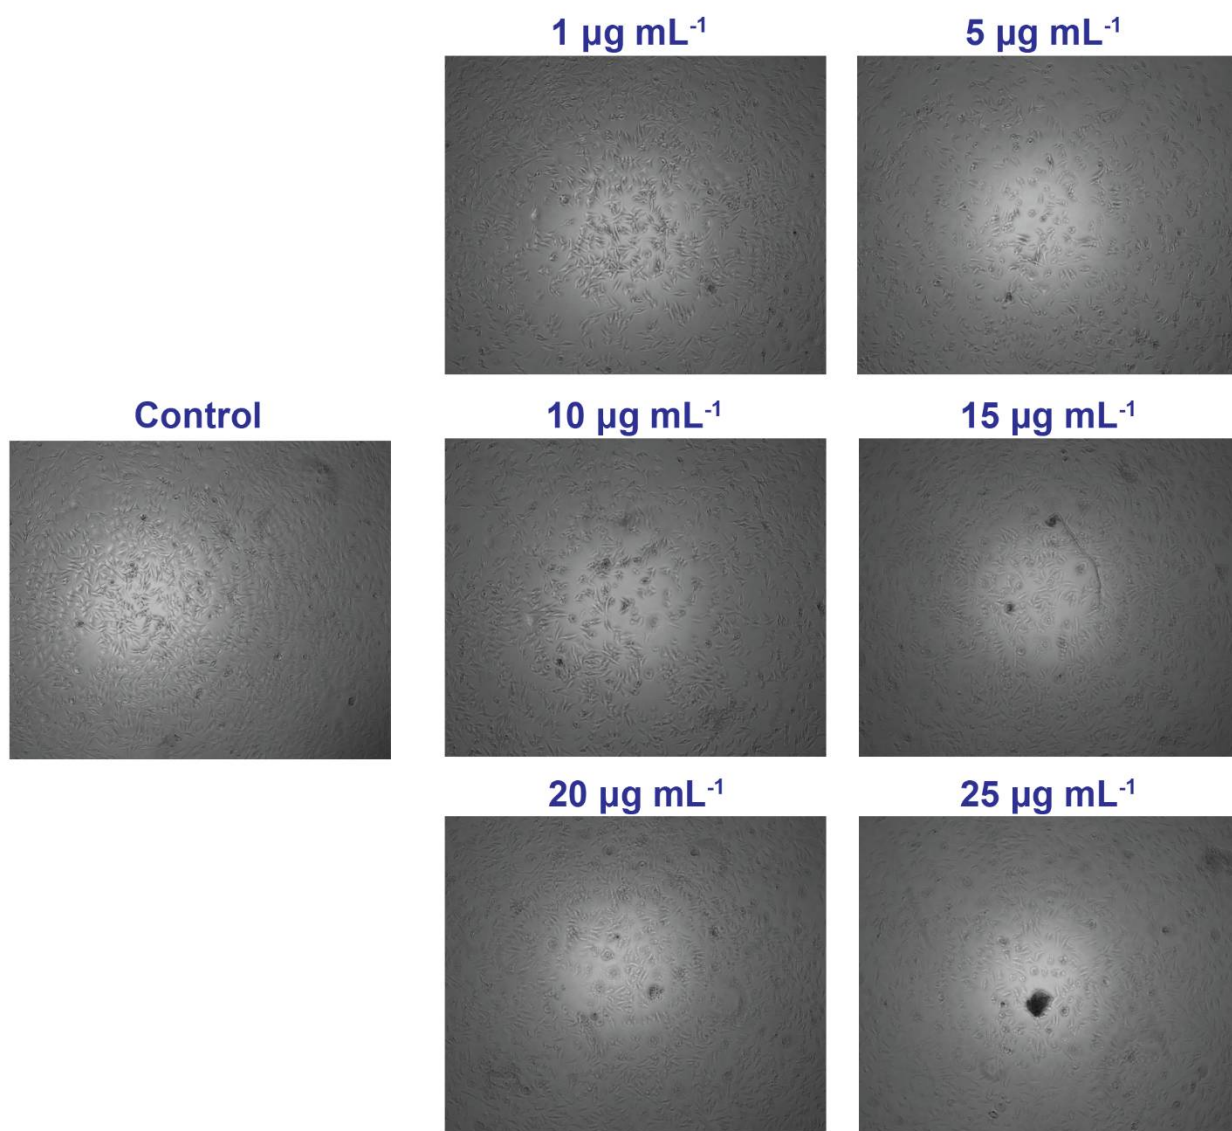

**Figure S9.** The bright-field microscopy images of Cur@ZIF-68 were collected from the cytotoxicity experiment towards the HDF normal cells

## Section S7. The Loading Studies of Cur over ZIF-68

The drug loading content (DLC) and drug loading efficiency (DLE) of ZIF-68 are determined by the following equations:

$$\text{DLC}(\%) = \frac{\text{(amount of loaded drug)}}{\text{(total amount of drug loaded nanoparticles)} \times 100\%} \quad (\text{S1})$$

$$\text{DLE}(\%) = \frac{\text{(amount of loaded drug)}}{\text{(total amount of feeding drug)} \times 100\%} \quad (\text{S2})$$

The linear forms of the Langmuir, Freundlich, Temkin, and Dubinin-Radushkevich (DR) are exhibited by the equations (S3)-(S6):

$$\frac{C_e}{q_e} = \frac{1}{K_L q_m} + \frac{C_e}{q_m} \quad (\text{S3})$$

$$\log q_e = \log K_F + \frac{1}{n} \log C_e \quad (\text{S4})$$

$$q_e = \frac{RT}{b} \ln(k_T C_e) \quad (\text{S5})$$

$$\ln q_e = \ln k_{DR} - C\varepsilon^2 \quad (\text{S6})$$

Where  $C_e$  ( $\text{mg L}^{-1}$ ) and  $q_e$  ( $\text{mg g}^{-1}$ ) are the Cur concentration and uptake capacity at equilibrium, respectively,  $q_m$  ( $\text{mg g}^{-1}$ ) is the theoretical maximum capacity of the Cur loading.  $K_L$  ( $\text{L mg}^{-1}$ ) and  $K_F$  ( $\text{mg g}^{-1} (\text{L g}^{-1})^{1/n}$ ) indicate the Langmuir and Freundlich constants, respectively.  $1/n$  parameter represents the uptake index of Freundlich isotherm.  $R$  is the gas constant,  $\beta$  and  $k_T$  are the constant of adsorption heat and the constant of Temkin, respectively, and  $T$  is the adsorption temperature. Meanwhile,  $k_{DR}$  and  $C$  are the constants of DR isotherm and the adsorption energy per adsorbent molecule, and  $\varepsilon$  is a constant.

The separation coefficient of  $R_L$  is calculated by equation (S7):

$$R_L = \frac{1}{1 + K_L C_0} \quad (\text{S7})$$

Where  $C_0$  and  $K_L$  are the initial concentration of Cur and the constant of Langmuir, respectively.

The pseudo-first-order and pseudo-second-order kinetics are used to confirm the uptake rate of Cur onto ZIF-68, which are illustrated by the equations:

$$\ln(q_e - q_t) = \ln q_e - k_f t \quad (\text{S8})$$

$$\frac{t}{q_t} = \frac{1}{k_s \cdot q_e^2} + \frac{t}{q_e} \quad (\text{S9})$$

Where  $q_t$  and  $q_e$  are the Cur adsorption amount at  $t$  and equilibrium,  $k_f$  and  $k_s$  are the rate constants of pseudo-first-order and pseudo-second-order models, respectively.

## Section S8. The In Vitro Release Testing of Cur@ZIF-68

The linear forms of the kinetic models such as zero-order, first-order, Higuchi, Korsmeyer–Peppas, and Hixson-Corwell are clearly described in the equations (S10)-(S14).

$$Q_t = Q_o + k_o t \quad (\text{S10})$$

$$\log Q_t = \log Q_o - k_1 t \quad (\text{S11})$$

$$Q_t = k_H t^{1/2} \quad (\text{S12})$$

$$Q_t / Q_\infty = k_{KP} t^n \quad (\text{S13})$$

$$W_o^{1/3} - W_t^{1/3} = k_{HC} t \quad (\text{S14})$$

Where  $Q_o$ ,  $Q_t$ , and  $Q_\infty$  are the original amount of Cur, cumulative Cur release at  $t$  time, and at infinite time, respectively.  $n$  is the release exponent of the Korsmeyer–Peppas model.  $W_o$  and  $W_t$  are the cubic root of the Cur remaining content at original and  $t$  time, respectively.  $k_o$ ,  $k_1$ ,  $k_H$ ,  $k_{KP}$ , and  $k_{HC}$  are the rate constants of the zero-order, first-order, Higuchi, Korsmeyer–Peppas, and Hixson-Corwell models.

**Table S1.** The data calculated from the isothermal models for the Cur loading onto ZIF-68

| <b>Isotherms</b>          | <b>Paramaters</b>                                               | <b>Value</b>         |
|---------------------------|-----------------------------------------------------------------|----------------------|
| Langmuir                  | $q_m$ (mg g <sup>-1</sup> )                                     | <b>833.3</b>         |
|                           | $K_L$ (L mg <sup>-1</sup> )                                     | 0.013                |
|                           | $R^2$                                                           | <b>0.996</b>         |
|                           | $R_L$                                                           | 0.1                  |
| Freundlich                | 1/n                                                             | 0.5381               |
|                           | $K_F$ (mg g <sup>-1</sup> (L g <sup>-1</sup> ) <sup>1/n</sup> ) | 33.61                |
|                           | $R^2$                                                           | <b>0.960</b>         |
| Temkin                    | b                                                               | 13.48                |
|                           | $k_T$ (L mg <sup>-1</sup> )                                     | 0.094                |
|                           | $R^2$                                                           | <b>0.982</b>         |
| Dubinin-Radushkevich (DR) | C (mol <sup>2</sup> J <sup>2</sup> )                            | $3.9 \times 10^{-5}$ |
|                           | $k_{DR}$ (mg g <sup>-1</sup> )                                  | 537.32               |
|                           | $R^2$                                                           | <b>0.769</b>         |

**Table S2.** Pseudo-first-order and second-order-models parameters for the adsorption of Cur over ZIF-68

| <b>Kinetic models</b> | <b>Paramaters</b>                                                 | <b>Value</b> |
|-----------------------|-------------------------------------------------------------------|--------------|
| Pseudo-first-order    | $q_e$ (mg g <sup>-1</sup> )                                       | <b>16.68</b> |
|                       | $K_f$ (min <sup>-1</sup> )                                        | 0.0175       |
|                       | $R^2$                                                             | <b>0.986</b> |
| Pseudo-second -order  | $q_e$ (mg g <sup>-1</sup> )                                       | <b>19.16</b> |
|                       | $k_s$ (10 <sup>-3</sup> ) (g mg <sup>-1</sup> min <sup>-1</sup> ) | 1.444        |
|                       | $R^2$                                                             | <b>0.999</b> |

**Table S3.** The maximum uptake capacities of Cur onto the various reported carriers

| <b>Materials</b>          | <b>Maximum uptake capacity<br/>(mg g<sup>-1</sup>)</b> | <b>Ref.</b>       |
|---------------------------|--------------------------------------------------------|-------------------|
| Ca-BDC                    | 140.0                                                  | [1]               |
| CD-MOF                    | 150.0                                                  | [2]               |
| Zein/SACD nanofibers      | 35.7                                                   | [3]               |
| ZIF-8@BPMO                | 666.0                                                  | [4]               |
| UiO-66-NH <sub>2</sub>    | 180.0                                                  | [5]               |
| Fe-MOF                    | 145.6                                                  | [5]               |
| Zn-BDC-NH <sub>2</sub>    | 179.4                                                  | [6]               |
| Zr-UiO-66                 | 466.4                                                  | [7]               |
| Zr-UiO-66-NH <sub>2</sub> | 382.9                                                  | [8]               |
| APTES-CMF/ZIF-8           | 626.4                                                  | [9]               |
| <b>ZIF-68</b>             | <b>720.1</b>                                           | <b>This study</b> |

**Table S4.** Cytotoxicity of ZIF-68, and Cur@ZIF-68 in HDF cells and MCF-7 cells

| <b>Materials</b> | <b>Concentration<br/>(<math>\mu\text{g mL}^{-1}</math>)</b> | <b>Cytotoxicity with<br/>HDF cell<br/>(%)</b> | <b>Cytotoxicity with<br/>MCF-7 cell<br/>(%)</b> |
|------------------|-------------------------------------------------------------|-----------------------------------------------|-------------------------------------------------|
| ZIF-68           | 5                                                           | 82.4                                          | 90.0                                            |
|                  | 10                                                          | 74.5                                          | 85.9                                            |
|                  | 15                                                          | 67.6                                          | 74.1                                            |
|                  | 20                                                          | 62.2                                          | 65.2                                            |
|                  | 25                                                          | 56.8                                          | 48.1                                            |
| Cur@ZIF-68       | 5                                                           | 93.4                                          | 80.3                                            |
|                  | 10                                                          | 85.5                                          | 70.6                                            |
|                  | 15                                                          | 82.7                                          | 65.2                                            |
|                  | 20                                                          | 80.0                                          | 47.5                                            |
|                  | <b>25</b>                                                   | <b>74.2</b>                                   | <b>28.1</b>                                     |

## References

- [1] George, P., Das, R. K., & Chowdhury, P., Facile microwave synthesis of Ca-BDC metal organic framework for adsorption and controlled release of Curcumin, *Microporous and Mesoporous Materials*, 2019, **281**, 161-171.
- [2] Su, Q., Liang, M., Xing, S., & Tan, M., Multi-sites interactions of turmeric-derived curcumin in cyclodextrin metal-organic framework for the enhanced adsorption and solubility in apple juice, *Food Hydrocolloids*, 2025, **170**, 111747.
- [3] Hu, Y., Rees, N. H., Qiu, C., Wang, J., Jin, Z., Wang, R., Zhu, Y., Chen, H., Wang P., Liu, S., Ren, F. & Williams, G. R., Fabrication of zein/modified cyclodextrin nanofibers for the stability enhancement and delivery of curcumin, *Food Hydrocolloids*, 2024, **156**, 110262.
- [4] Nguyen, T. T. T., Le, B. Q. G., Dang, M. H. D., Phan, B. T., Mai, N. X. D., & Doan, T. L. H., Facile synthesis of novel fluorescent organosilica-coated MOF nanoparticles for fast curcumin adsorption, *Microporous and Mesoporous Materials*, 2022, **338**, 111944.
- [5] El-Shafey, A. A., Hegab, M. H., Seliem, M. M., Barakat, A. M., Mostafa, N. E., Abdel-Maksoud, H. A., & Abdelhameed, R. M., Curcumin@metal organic frameworks nano-composite for treatment of chronic toxoplasmosis, *Journal of materials science: Materials in Medicine*, 2020, **31**, 90.
- [6] Dang, Y. T., Dang, M. H. D., Mai, N. X. D., Nguyen, L. H. T., Phan, T. B., Le, H. V., & Doan, T. L. H., Room temperature synthesis of biocompatible nano Zn-MOF for the rapid and selective adsorption of curcumin. *Journal of Science: Advanced Materials and Devices*, 2020, **5**, 560-565.
- [7] Dang, Y. T., Hoang, H. T., Dong, H. C., Bui, K. B. T., Nguyen, L. H. T., Phan, T. B., Kawazoe, Y. & Doan, T. L. H., Microwave-assisted synthesis of nano Hf-and Zr-based metal-organic frameworks for enhancement of curcumin adsorption, *Microporous and Mesoporous Materials*, 2020, **298**, 110064.
- [8] Molavi, H., Zamani, M., Aghajanzadeh, M., Kheiri Manjili, H., Danafar, H., & Shojaei, A., Evaluation of UiO-66 metal organic framework as an effective sorbent for Curcumin's overdose, *Applied Organometallic Chemistry*, 2018, **32**, e4221.
- [9] Wijanarko, M. G., Widagdo, A. J., Ismadji, M. S., Kusuma, K., Yuliana, M., Ismadji, S., Hartono, S. B., Lie, J., Shu, H., Abdullah, H., Kadja, G. T. M., Wijaya, C. J. & Soetaredjo, F. E., Utilization of APTES-functionalized coconut waste-based cellulose microfiber/zeolitic-imidazolate framework-8 composite for curcumin delivery, *Materials Today Sustainability*, 2023, **21**, 100332.
